# Supplementary material
Source: PubMed Central journal article supplement (PMC4407732)
Supplement: supp_mol.114.095273_Supplementary_95273.pdf [file supp_mol.114.095273_Supplementary_95273.pdf]

**Yet another function of p53: the switch that determines whether radiation-induced autophagy will be cytoprotective or nonprotective. Implications for autophagy inhibition as a therapeutic strategy.**

Shweta Chakradeo, Khushboo Sharma , Aisha Alhaddad , Duaa Bakhshwin, Ngoc Le, Hisashi Harada, Wataru Nakajima, W. Andrew Yeudall, Suzy V. Torti, Frank M. Torti, and David A. Gewirtz

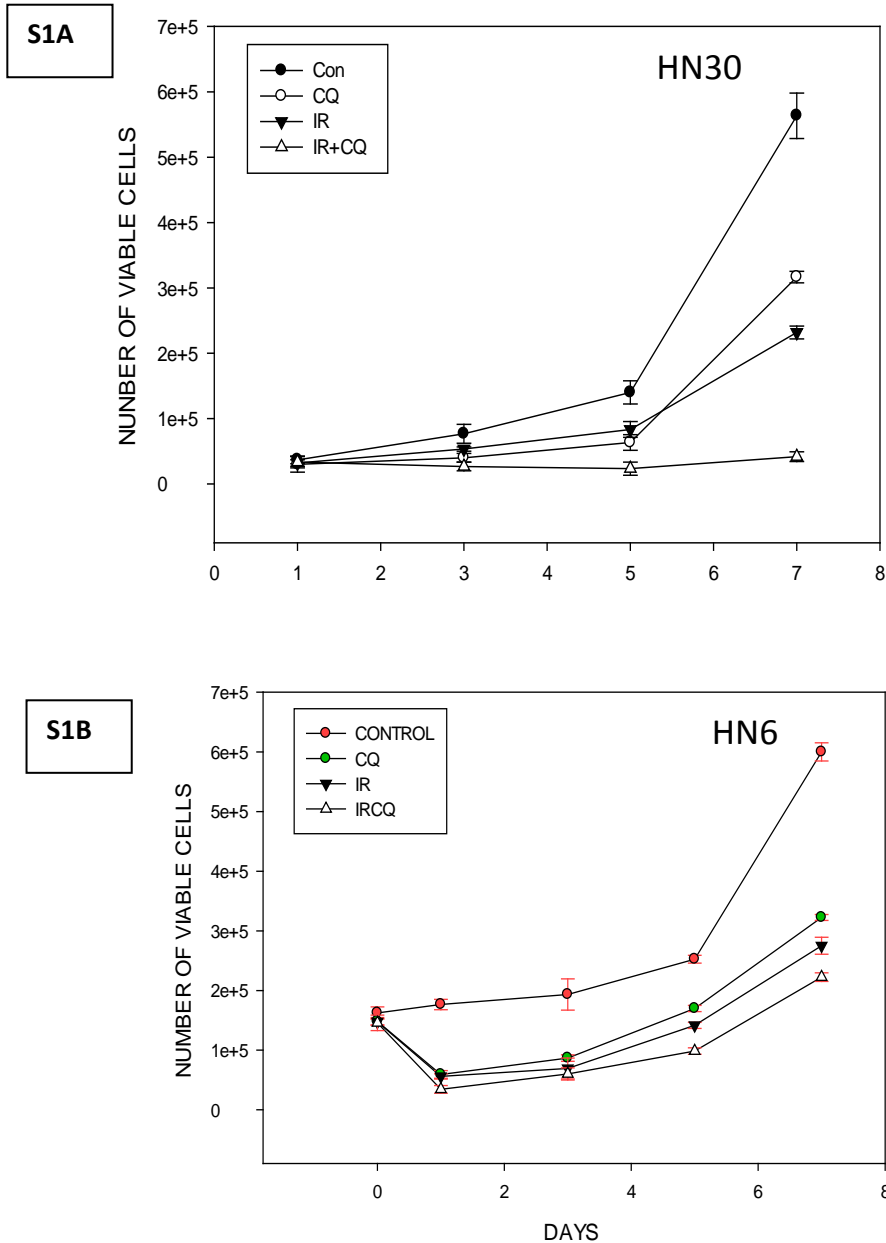

**Supplementary Figure 1. A.** Temporal response to radiation (4 Gy) and radiation + chloroquine (10 $\mu$ M) in HN30 cells. Data is representative of three experiments plotted as mean $\pm$  standard error. **B.** Temporal response to radiation (4 Gy) and radiation + chloroquine (10 $\mu$ M) in HN6 cells. Data is representative of three experiments plotted as mean $\pm$  standard error.

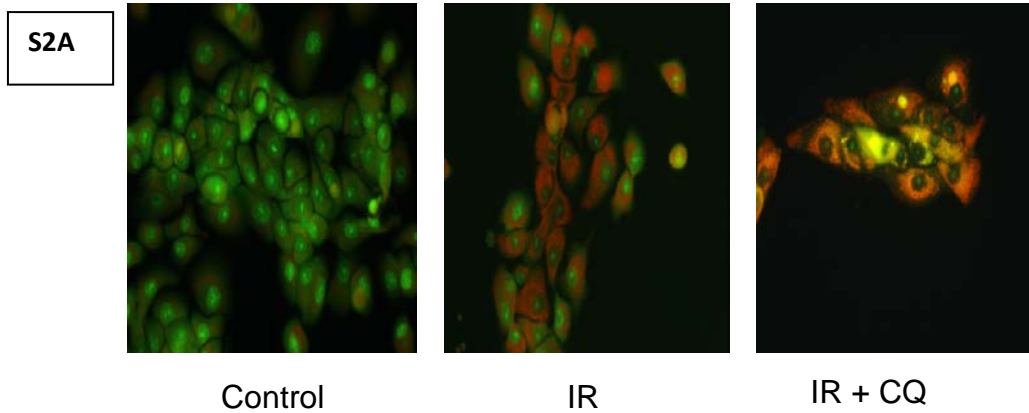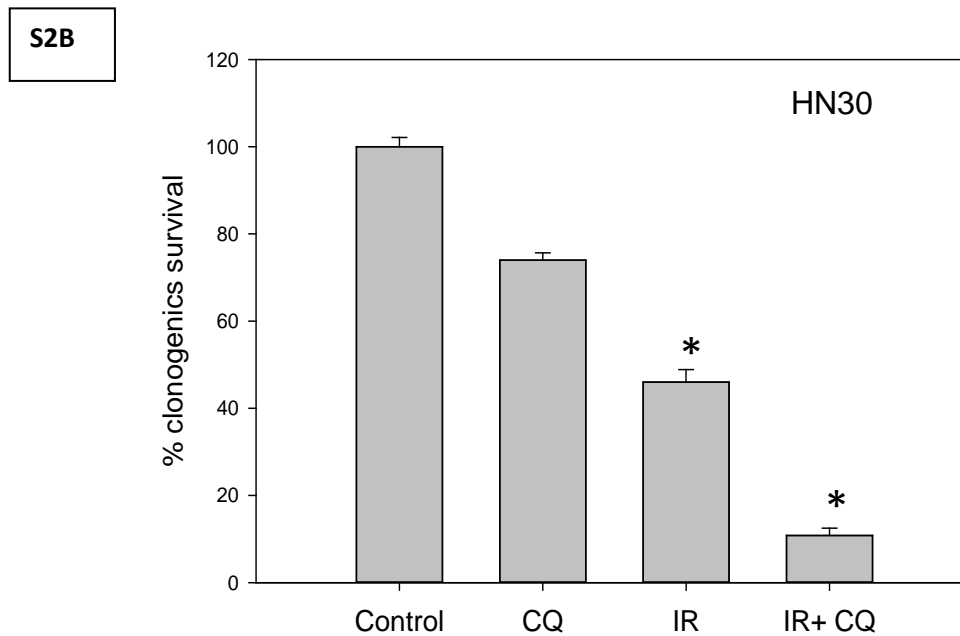

**Supplementary Figure 2. A.** Acridine orange staining in HN30 shows induction of autophagy and inhibition of autophagy by chloroquine. **B.** Clonogenic survival assay in HN30 cells indicating sensitization by autophagy inhibition ( n=3, mean±SE,\*p<0.05 \*\*p<0.001)
